# Supplementary material for: A random effects meta-analysis model with Box-Cox transformation
Source: Springer Nature journal article supplement (doi:10.1186/s12874-017-0376-7), 2017-07-19
Supplement: MOESM2 [file 13314838]

## Additional file 2 to “A random effects meta-analysis model with Box-Cox transformation”

### 1 Random effects distributions in the simulation study

In the simulation study, we considered a variety of scenarios for the random effects distributions (normal distribution, skew-normal distribution, shifted exponential distribution and shifted log-normal distribution) which a true treatment effect  $\theta_i$  for the  $i$ th study was drawn from. Here, the random effects distributions are graphically illustrated for each scenario. Figure S1, Figure S2, Figure S3, Figure S4, Figure S5, Figure S6 and Figure S7 show density functions of the random effects distribution for the scenarios 1-3, 4-6, 7-9, 10-12, 13-15, 16-18 and 19-21, respectively.

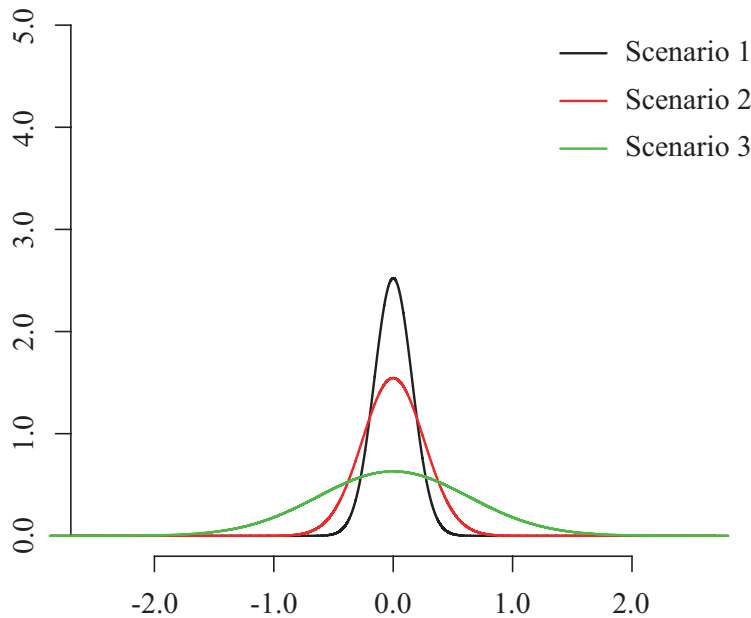

Figure S1. Density functions of the random effects distributions (Scenario 1-3: Normal distribution).

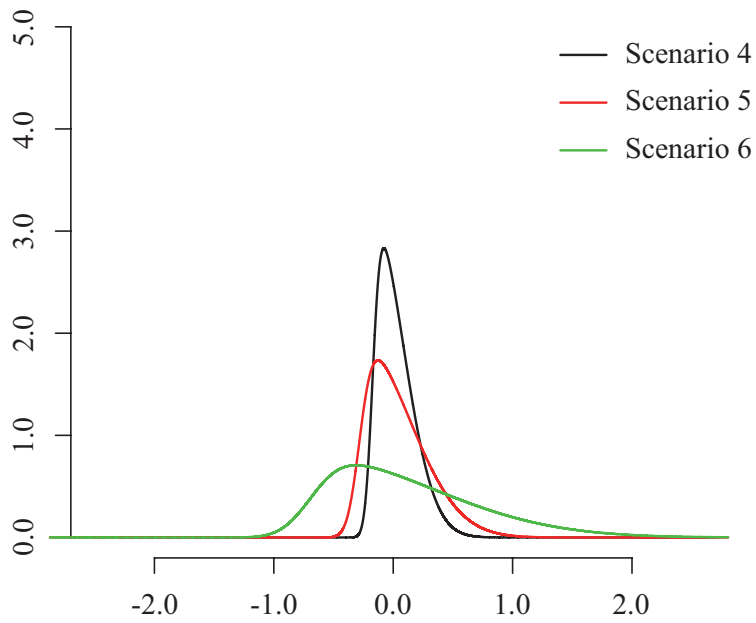

Figure S2. Density functions of the random effects distributions (Scenario 4-6: Skew-normal distribution with moderate positive skewness).

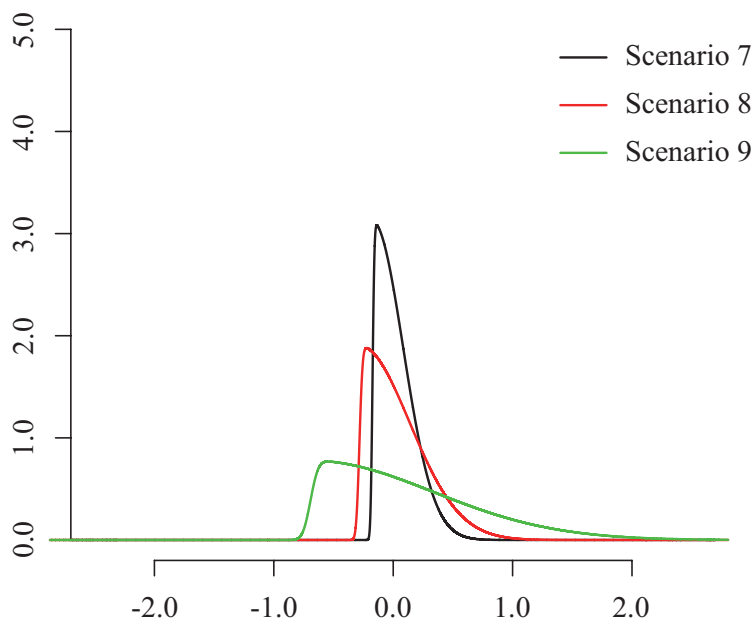

Figure S3. Density functions of the random effects distributions (Scenario 7-9: Skew-normal distribution with large positive skewness).

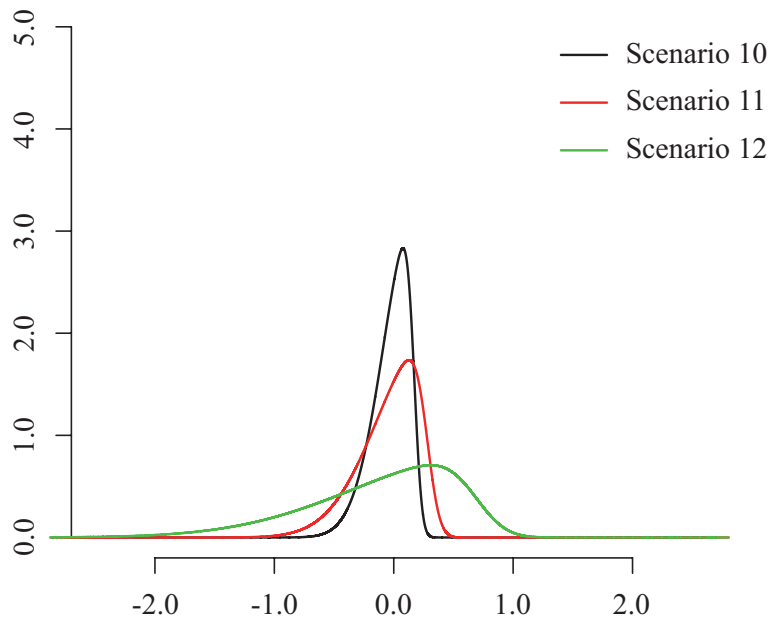

Figure S4. Density functions of the random effects distributions (Scenario 10-12: Skew-normal distribution with moderate negative skewness).

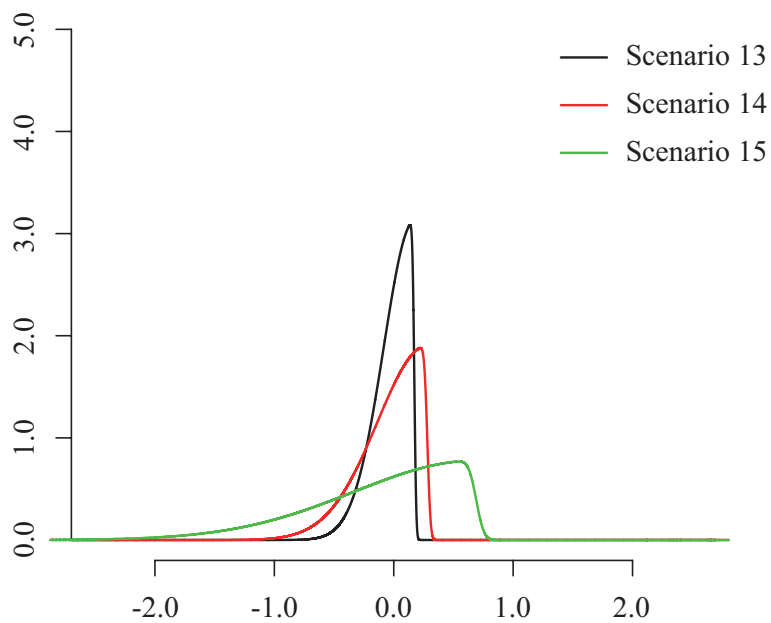

Figure S5. Density functions of the random effects distributions (Scenario 13-15: Skew-normal distribution with large negative skewness).

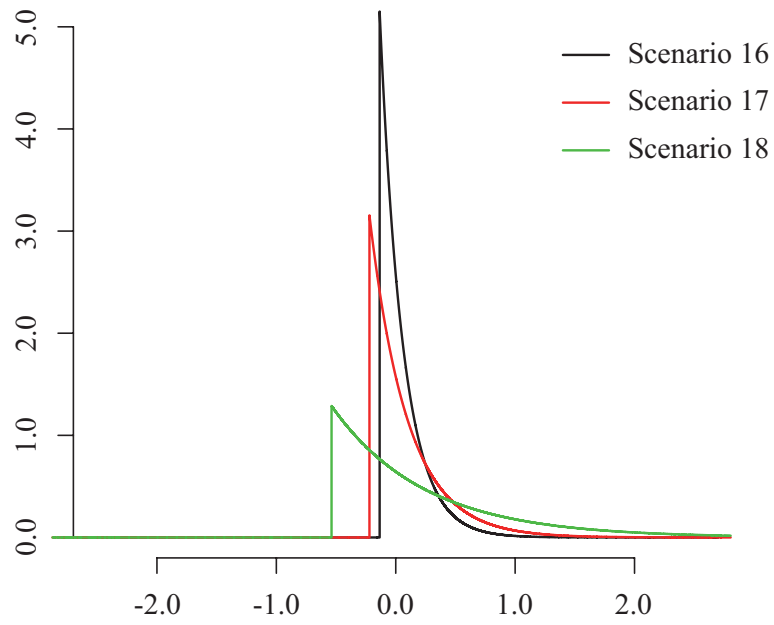

Figure S6. Density functions of the random effects distributions (Scenario 16-18: Shifted exponential distribution).

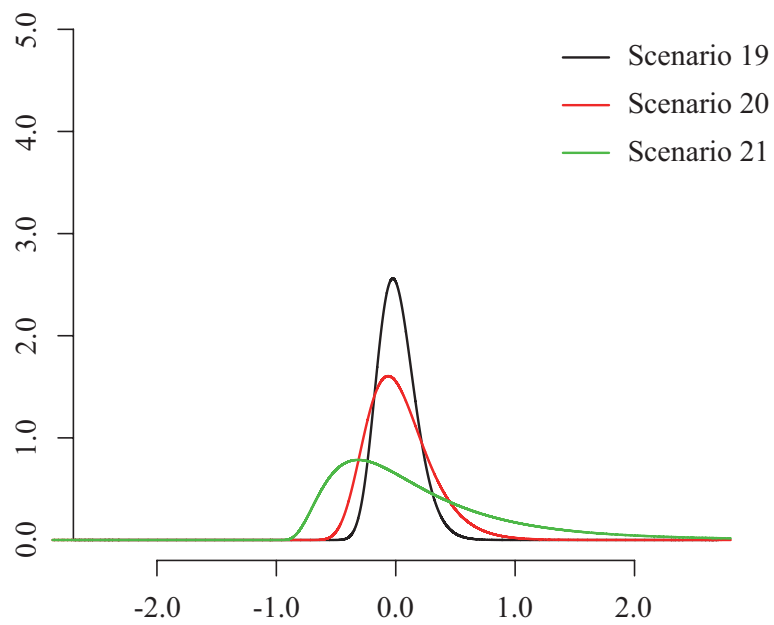

Figure S7. Density functions of the random effects distributions (Scenario 19-21: Shifted log-normal distribution).

## 2 Results of the simulation study

Table S1, Table S2, Table S3 and Table S4 show results from the two models, for each scenario of the number of studies  $k = 5, 10, 20$  and  $40$ , respectively.

Table S1. Bias, root mean square error, coverage probability from the two models for scenario of the number of studies  $k = 5$ .

| Scenario                                                                      | True  | Bias  |        |       | RMSE  |       |       | Coverage prob. (%) |      |       |
|-------------------------------------------------------------------------------|-------|-------|--------|-------|-------|-------|-------|--------------------|------|-------|
|                                                                               |       | NRE   | BC     | BC-SI | NRE   | BC    | BC-SI | NRE                | BC   | BC-SI |
| Scenario 1-3: Normal distribution (N)                                         |       |       |        |       |       |       |       |                    |      |       |
| Overall mean or overall median effect                                         |       |       |        |       |       |       |       |                    |      |       |
| 1                                                                             | 0.000 | 0.000 | -0.030 | 0.000 | 0.158 | 0.176 | 0.177 | 99.5               | 93.5 | 90.9  |
| 2                                                                             | 0.000 | 0.000 | -0.047 | 0.001 | 0.184 | 0.210 | 0.213 | 99.1               | 93.8 | 91.5  |
| 3                                                                             | 0.000 | 0.000 | -0.130 | 0.004 | 0.316 | 0.379 | 0.397 | 97.4               | 94.6 | 93.8  |
| $I^2$ or ratio of IQR squares (%)                                             |       |       |        |       |       |       |       |                    |      |       |
| 1                                                                             | 20.0  | 23.54 | 23.51  | 25.22 | 29.88 | 28.94 | 29.58 | 97.5               | 97.1 | 98.6  |
| 2                                                                             | 40.0  | 10.71 | 9.05   | 10.52 | 23.05 | 21.03 | 20.21 | 96.5               | 96.2 | 98.1  |
| 3                                                                             | 80.0  | -2.47 | -7.09  | -7.21 | 18.57 | 21.44 | 19.90 | 94.1               | 91.7 | 97.8  |
| Scenario 4-6: Skew-normal distribution with moderate positive skewness (pSN1) |       |       |        |       |       |       |       |                    |      |       |
| Overall mean or overall median effect                                         |       |       |        |       |       |       |       |                    |      |       |
| 4                                                                             | 0.000 | 0.025 | -0.008 | 0.024 | 0.159 | 0.169 | 0.176 | 99.5               | 92.0 | 90.3  |
| 5                                                                             | 0.000 | 0.043 | -0.011 | 0.033 | 0.188 | 0.196 | 0.212 | 99.1               | 92.5 | 91.2  |
| 6                                                                             | 0.000 | 0.110 | -0.054 | 0.051 | 0.333 | 0.325 | 0.384 | 97.6               | 93.9 | 93.6  |
| $I^2$ or ratio of IQR squares (%)                                             |       |       |        |       |       |       |       |                    |      |       |
| 4                                                                             | 20.0  | 23.59 | 23.80  | 25.34 | 29.90 | 29.18 | 29.57 | 97.4               | 96.9 | 98.7  |
| 5                                                                             | 40.0  | 10.91 | 9.45   | 10.68 | 23.26 | 21.28 | 20.27 | 96.9               | 96.3 | 98.2  |
| 6                                                                             | 80.0  | -3.89 | -8.99  | -8.86 | 19.94 | 22.22 | 21.02 | 93.6               | 94.3 | 98.1  |
| Scenario 7-9: Skew-normal distribution with large positive skewness (pSN2)    |       |       |        |       |       |       |       |                    |      |       |
| Overall mean or overall median effect                                         |       |       |        |       |       |       |       |                    |      |       |
| 7                                                                             | 0.000 | 0.032 | -0.001 | 0.028 | 0.160 | 0.172 | 0.178 | 99.6               | 91.1 | 89.8  |
| 8                                                                             | 0.000 | 0.054 | 0.000  | 0.045 | 0.192 | 0.196 | 0.216 | 99.1               | 91.4 | 90.8  |
| 9                                                                             | 0.000 | 0.125 | -0.045 | 0.055 | 0.330 | 0.313 | 0.380 | 98.0               | 94.2 | 94.0  |
| $I^2$ or ratio of IQR squares (%)                                             |       |       |        |       |       |       |       |                    |      |       |
| 7                                                                             | 20.0  | 23.29 | 23.12  | 24.98 | 29.58 | 28.51 | 29.21 | 97.7               | 97.2 | 98.9  |
| 8                                                                             | 40.0  | 10.37 | 9.10   | 10.21 | 22.95 | 20.76 | 19.89 | 96.5               | 96.7 | 98.3  |
| 9                                                                             | 80.0  | -3.81 | -9.10  | -8.94 | 19.75 | 22.25 | 21.22 | 93.8               | 94.7 | 97.6  |

RMSE: root mean square error, prob.: probability

NRE: normal random effects model, BC: proposed model using Box-Cox transformation

BC-SI: proposed model using Box-Cox transformation with the sign inversion for negatively skewed data

Table S1 (cont'd). Bias, root mean square error, coverage probability from the two models for scenario of the number of studies  $k = 5$ .

| Scenario                                                                        | True  | Bias   |        |        | RMSE  |       |       | Coverage prob. (%) |      |       |
|---------------------------------------------------------------------------------|-------|--------|--------|--------|-------|-------|-------|--------------------|------|-------|
|                                                                                 |       | NRE    | BC     | BC-SI  | NRE   | BC    | BC-SI | NRE                | BC   | BC-SI |
| Scenario 10-12: Skew-normal distribution with moderate negative skewness (nSN1) |       |        |        |        |       |       |       |                    |      |       |
| Overall mean or overall median effect                                           |       |        |        |        |       |       |       |                    |      |       |
| 10                                                                              | 0.000 | -0.027 | -0.057 | -0.024 | 0.161 | 0.186 | 0.180 | 99.6               | 94.7 | 90.9  |
| 11                                                                              | 0.000 | -0.047 | -0.089 | -0.038 | 0.188 | 0.225 | 0.213 | 99.0               | 95.2 | 91.9  |
| 12                                                                              | 0.000 | -0.110 | -0.201 | -0.048 | 0.341 | 0.432 | 0.392 | 97.4               | 95.0 | 93.5  |
| $I^2$ or ratio of IQR squares (%)                                               |       |        |        |        |       |       |       |                    |      |       |
| 10                                                                              | 20.0  | 23.62  | 23.69  | 25.25  | 30.02 | 29.13 | 29.68 | 97.1               | 96.9 | 98.7  |
| 11                                                                              | 40.0  | 10.72  | 8.98   | 10.33  | 23.26 | 21.08 | 20.23 | 96.4               | 96.1 | 98.0  |
| 12                                                                              | 80.0  | -3.57  | -8.58  | -8.41  | 19.80 | 22.94 | 20.94 | 93.5               | 89.4 | 97.9  |
| Scenario 13-15: Skew-normal distribution with large negative skewness (nSN2)    |       |        |        |        |       |       |       |                    |      |       |
| Overall mean or overall median effect                                           |       |        |        |        |       |       |       |                    |      |       |
| 13                                                                              | 0.000 | -0.033 | -0.061 | -0.030 | 0.160 | 0.185 | 0.177 | 99.4               | 94.7 | 90.2  |
| 14                                                                              | 0.000 | -0.047 | -0.088 | -0.039 | 0.187 | 0.224 | 0.212 | 99.2               | 94.8 | 90.8  |
| 15                                                                              | 0.000 | -0.129 | -0.213 | -0.056 | 0.341 | 0.438 | 0.383 | 97.5               | 95.4 | 93.7  |
| $I^2$ or ratio of IQR squares (%)                                               |       |        |        |        |       |       |       |                    |      |       |
| 13                                                                              | 20.0  | 23.12  | 23.14  | 24.87  | 29.39 | 28.50 | 29.18 | 97.7               | 97.1 | 98.9  |
| 14                                                                              | 40.0  | 10.45  | 8.75   | 10.31  | 22.88 | 20.73 | 19.84 | 96.7               | 96.1 | 98.3  |
| 15                                                                              | 80.0  | -4.07  | -9.40  | -9.23  | 20.04 | 23.11 | 21.28 | 93.7               | 89.6 | 97.9  |
| Scenario 16-18: Shifted exponential distribution (EXP)                          |       |        |        |        |       |       |       |                    |      |       |
| Overall mean or overall median effect                                           |       |        |        |        |       |       |       |                    |      |       |
| 16                                                                              | 0.000 | 0.062  | 0.021  | 0.053  | 0.177 | 0.176 | 0.189 | 99.4               | 90.3 | 90.0  |
| 17                                                                              | 0.000 | 0.096  | 0.029  | 0.070  | 0.223 | 0.201 | 0.228 | 98.9               | 89.6 | 89.9  |
| 18                                                                              | 0.000 | 0.237  | 0.014  | 0.094  | 0.446 | 0.319 | 0.400 | 98.2               | 92.9 | 92.7  |
| $I^2$ or ratio of IQR squares (%)                                               |       |        |        |        |       |       |       |                    |      |       |
| 16                                                                              | 20.0  | 25.66  | 25.23  | 26.64  | 32.17 | 30.69 | 31.11 | 95.5               | 96.7 | 98.3  |
| 17                                                                              | 40.0  | 13.23  | 10.98  | 11.92  | 25.90 | 22.89 | 22.13 | 91.6               | 95.4 | 96.9  |
| 18                                                                              | 80.0  | -2.91  | -8.53  | -8.53  | 21.26 | 22.65 | 21.88 | 83.2               | 94.4 | 96.7  |
| Scenario 19-21: Shifted log-normal distribution (LN)                            |       |        |        |        |       |       |       |                    |      |       |
| Overall mean or overall median effect                                           |       |        |        |        |       |       |       |                    |      |       |
| 19                                                                              | 0.000 | 0.013  | -0.021 | 0.011  | 0.157 | 0.173 | 0.177 | 99.7               | 93.5 | 91.6  |
| 20                                                                              | 0.000 | 0.035  | -0.021 | 0.026  | 0.192 | 0.203 | 0.217 | 99.2               | 92.6 | 91.3  |
| 21                                                                              | 0.000 | 0.211  | -0.012 | 0.073  | 0.448 | 0.333 | 0.401 | 98.2               | 93.3 | 93.0  |
| $I^2$ or ratio of IQR squares (%)                                               |       |        |        |        |       |       |       |                    |      |       |
| 19                                                                              | 20.0  | 24.10  | 24.14  | 25.68  | 30.40 | 29.56 | 29.98 | 97.3               | 96.9 | 98.8  |
| 20                                                                              | 40.0  | 11.53  | 9.86   | 10.99  | 23.68 | 21.62 | 20.66 | 96.0               | 96.5 | 98.0  |
| 21                                                                              | 80.0  | -1.72  | -7.48  | -7.38  | 20.13 | 22.07 | 21.10 | 83.3               | 93.6 | 96.7  |

RMSE: root mean square error, prob.: probability

NRE: normal random effects model, BC: proposed model using Box-Cox transformation

BC-SI: proposed model using Box-Cox transformation with the sign inversion for negatively skewed data

Table S2. Bias, root mean square error, coverage probability from the two models for scenario of the number of studies  $k = 10$ .

| Scenario                                                                      | True  | Bias   |        |       | RMSE  |       |       | Coverage prob. (%) |      |       |
|-------------------------------------------------------------------------------|-------|--------|--------|-------|-------|-------|-------|--------------------|------|-------|
|                                                                               |       | NRE    | BC     | BC-SI | NRE   | BC    | BC-SI | NRE                | BC   | BC-SI |
| Scenario 1-3: Normal distribution (N)                                         |       |        |        |       |       |       |       |                    |      |       |
| Overall mean or overall median effect                                         |       |        |        |       |       |       |       |                    |      |       |
| 1                                                                             | 0.000 | 0.001  | -0.026 | 0.000 | 0.112 | 0.125 | 0.129 | 98.0               | 96.2 | 95.8  |
| 2                                                                             | 0.000 | 0.000  | -0.038 | 0.000 | 0.131 | 0.150 | 0.156 | 97.1               | 95.9 | 95.7  |
| 3                                                                             | 0.000 | -0.001 | -0.079 | 0.000 | 0.228 | 0.266 | 0.281 | 95.5               | 94.9 | 95.4  |
| $I^2$ or ratio of IQR squares (%)                                             |       |        |        |       |       |       |       |                    |      |       |
| 1                                                                             | 20.0  | 10.77  | 10.99  | 12.38 | 19.95 | 19.78 | 20.27 | 97.9               | 97.6 | 98.1  |
| 2                                                                             | 40.0  | 1.54   | 0.95   | 2.27  | 19.75 | 19.61 | 19.11 | 96.9               | 96.8 | 97.4  |
| 3                                                                             | 80.0  | -1.90  | -3.52  | -2.57 | 13.84 | 16.16 | 15.01 | 93.1               | 92.1 | 94.7  |
| Scenario 4-6: Skew-normal distribution with moderate positive skewness (pSN1) |       |        |        |       |       |       |       |                    |      |       |
| Overall mean or overall median effect                                         |       |        |        |       |       |       |       |                    |      |       |
| 4                                                                             | 0.000 | 0.025  | -0.005 | 0.020 | 0.116 | 0.122 | 0.132 | 97.5               | 95.6 | 95.5  |
| 5                                                                             | 0.000 | 0.043  | -0.004 | 0.027 | 0.139 | 0.143 | 0.158 | 96.2               | 95.1 | 94.8  |
| 6                                                                             | 0.000 | 0.110  | -0.020 | 0.029 | 0.254 | 0.238 | 0.272 | 95.2               | 95.2 | 95.1  |
| $I^2$ or ratio of IQR squares (%)                                             |       |        |        |       |       |       |       |                    |      |       |
| 4                                                                             | 20.0  | 10.31  | 10.74  | 11.92 | 19.59 | 19.50 | 19.83 | 98.0               | 97.6 | 98.3  |
| 5                                                                             | 40.0  | 1.28   | 0.98   | 1.93  | 19.88 | 19.61 | 19.10 | 96.7               | 96.9 | 97.5  |
| 6                                                                             | 80.0  | -2.89  | -4.57  | -4.21 | 15.14 | 16.98 | 16.29 | 92.0               | 94.1 | 95.9  |
| Scenario 7-9: Skew-normal distribution with large positive skewness (pSN2)    |       |        |        |       |       |       |       |                    |      |       |
| Overall mean or overall median effect                                         |       |        |        |       |       |       |       |                    |      |       |
| 7                                                                             | 0.000 | 0.032  | 0.002  | 0.027 | 0.117 | 0.122 | 0.133 | 97.4               | 95.6 | 95.2  |
| 8                                                                             | 0.000 | 0.050  | 0.003  | 0.034 | 0.139 | 0.140 | 0.157 | 96.4               | 95.1 | 94.9  |
| 9                                                                             | 0.000 | 0.127  | -0.010 | 0.035 | 0.257 | 0.230 | 0.265 | 95.4               | 95.5 | 95.4  |
| $I^2$ or ratio of IQR squares (%)                                             |       |        |        |       |       |       |       |                    |      |       |
| 7                                                                             | 20.0  | 10.54  | 10.99  | 12.11 | 19.94 | 19.90 | 20.19 | 97.8               | 97.6 | 98.1  |
| 8                                                                             | 40.0  | 0.91   | 0.58   | 1.47  | 19.84 | 19.58 | 19.01 | 96.6               | 97.0 | 97.5  |
| 9                                                                             | 80.0  | -3.78  | -5.81  | -5.55 | 16.07 | 18.02 | 17.42 | 91.5               | 94.7 | 96.3  |

RMSE: root mean square error, prob.: probability

NRE: normal random effects model, BC: proposed model using Box-Cox transformation

BC-SI: proposed model using Box-Cox transformation with the sign inversion for negatively skewed data

Table S2 (cont'd). Bias, root mean square error, coverage probability from the two models for scenario of the number of studies  $k = 10$ .

| Scenario                                                                        | True  | Bias   |        |        | RMSE  |       |       | Coverage prob. (%) |      |       |
|---------------------------------------------------------------------------------|-------|--------|--------|--------|-------|-------|-------|--------------------|------|-------|
|                                                                                 |       | NRE    | BC     | BC-SI  | NRE   | BC    | BC-SI | NRE                | BC   | BC-SI |
| Scenario 10-12: Skew-normal distribution with moderate negative skewness (nSN1) |       |        |        |        |       |       |       |                    |      |       |
| Overall mean or overall median effect                                           |       |        |        |        |       |       |       |                    |      |       |
| 10                                                                              | 0.000 | -0.027 | -0.052 | -0.023 | 0.116 | 0.134 | 0.131 | 97.6               | 96.3 | 95.9  |
| 11                                                                              | 0.000 | -0.044 | -0.071 | -0.030 | 0.138 | 0.162 | 0.157 | 96.5               | 95.0 | 95.2  |
| 12                                                                              | 0.000 | -0.111 | -0.126 | -0.026 | 0.252 | 0.293 | 0.270 | 95.5               | 94.0 | 95.2  |
| $I^2$ or ratio of IQR squares (%)                                               |       |        |        |        |       |       |       |                    |      |       |
| 10                                                                              | 20.0  | 10.70  | 10.90  | 12.31  | 19.96 | 19.65 | 20.21 | 97.6               | 97.5 | 98.1  |
| 11                                                                              | 40.0  | 1.40   | 0.08   | 1.99   | 20.02 | 19.69 | 19.28 | 96.8               | 96.7 | 97.5  |
| 12                                                                              | 80.0  | -2.70  | -6.08  | -4.20  | 14.99 | 18.10 | 16.31 | 91.7               | 91.5 | 95.8  |
| Scenario 13-15: Skew-normal distribution with large negative skewness (nSN2)    |       |        |        |        |       |       |       |                    |      |       |
| Overall mean or overall median effect                                           |       |        |        |        |       |       |       |                    |      |       |
| 13                                                                              | 0.000 | -0.031 | -0.055 | -0.027 | 0.116 | 0.134 | 0.130 | 97.4               | 96.0 | 95.2  |
| 14                                                                              | 0.000 | -0.052 | -0.075 | -0.036 | 0.138 | 0.161 | 0.154 | 96.3               | 95.0 | 95.1  |
| 15                                                                              | 0.000 | -0.123 | -0.130 | -0.029 | 0.256 | 0.293 | 0.265 | 95.0               | 93.5 | 94.9  |
| $I^2$ or ratio of IQR squares (%)                                               |       |        |        |        |       |       |       |                    |      |       |
| 13                                                                              | 20.0  | 10.24  | 10.49  | 11.88  | 19.55 | 19.32 | 19.79 | 98.1               | 97.8 | 98.4  |
| 14                                                                              | 40.0  | 0.66   | -0.78  | 1.23   | 19.84 | 19.45 | 18.97 | 96.5               | 96.8 | 97.4  |
| 15                                                                              | 80.0  | -3.80  | -7.54  | -5.49  | 15.92 | 19.10 | 17.06 | 91.6               | 91.8 | 96.4  |
| Scenario 16-18: Shifted exponential distribution (EXP)                          |       |        |        |        |       |       |       |                    |      |       |
| Overall mean or overall median effect                                           |       |        |        |        |       |       |       |                    |      |       |
| 16                                                                              | 0.000 | 0.059  | 0.020  | 0.044  | 0.133 | 0.126 | 0.140 | 96.7               | 94.9 | 94.5  |
| 17                                                                              | 0.000 | 0.096  | 0.030  | 0.057  | 0.172 | 0.145 | 0.166 | 95.3               | 94.8 | 94.4  |
| 18                                                                              | 0.000 | 0.240  | 0.038  | 0.064  | 0.359 | 0.238 | 0.265 | 94.9               | 96.1 | 95.7  |
| $I^2$ or ratio of IQR squares (%)                                               |       |        |        |        |       |       |       |                    |      |       |
| 16                                                                              | 20.0  | 13.89  | 13.81  | 14.80  | 23.35 | 22.62 | 22.88 | 94.6               | 95.5 | 96.2  |
| 17                                                                              | 40.0  | 6.61   | 5.05   | 5.75   | 23.10 | 21.84 | 21.51 | 89.9               | 93.6 | 94.2  |
| 18                                                                              | 80.0  | -0.39  | -4.21  | -4.09  | 16.70 | 18.14 | 17.81 | 75.5               | 91.7 | 92.8  |
| Scenario 19-21: Shifted log-normal distribution (LN)                            |       |        |        |        |       |       |       |                    |      |       |
| Overall mean or overall median effect                                           |       |        |        |        |       |       |       |                    |      |       |
| 19                                                                              | 0.000 | 0.012  | -0.017 | 0.010  | 0.115 | 0.124 | 0.131 | 97.8               | 96.1 | 95.6  |
| 20                                                                              | 0.000 | 0.035  | -0.012 | 0.022  | 0.137 | 0.144 | 0.157 | 96.7               | 95.6 | 95.4  |
| 21                                                                              | 0.000 | 0.207  | 0.012  | 0.043  | 0.345 | 0.240 | 0.266 | 95.9               | 96.4 | 96.3  |
| $I^2$ or ratio of IQR squares (%)                                               |       |        |        |        |       |       |       |                    |      |       |
| 19                                                                              | 20.0  | 10.89  | 11.18  | 12.41  | 20.11 | 19.87 | 20.31 | 97.9               | 97.4 | 98.1  |
| 20                                                                              | 40.0  | 2.59   | 1.89   | 2.99   | 20.23 | 19.92 | 19.47 | 95.8               | 96.2 | 96.9  |
| 21                                                                              | 80.0  | 0.43   | -2.76  | -2.51  | 15.68 | 17.04 | 16.58 | 75.5               | 90.6 | 91.7  |

RMSE: root mean square error, prob.: probability

NRE: normal random effects model, BC: proposed model using Box-Cox transformation

BC-SI: proposed model using Box-Cox transformation with the sign inversion for negatively skewed data



Table S3. Bias, root mean square error, coverage probability from the two models for scenario of the number of studies  $k = 20$ .

| Scenario                                                                      | True  | Bias   |        |       | RMSE  |       |       | Coverage prob. (%) |      |       |
|-------------------------------------------------------------------------------|-------|--------|--------|-------|-------|-------|-------|--------------------|------|-------|
|                                                                               |       | NRE    | BC     | BC-SI | NRE   | BC    | BC-SI | NRE                | BC   | BC-SI |
| Scenario 1-3: Normal distribution (N)                                         |       |        |        |       |       |       |       |                    |      |       |
| Overall mean or overall median effect                                         |       |        |        |       |       |       |       |                    |      |       |
| 1                                                                             | 0.000 | -0.001 | -0.017 | 0.000 | 0.080 | 0.089 | 0.091 | 96.6               | 94.6 | 94.7  |
| 2                                                                             | 0.000 | 0.001  | -0.020 | 0.000 | 0.093 | 0.105 | 0.109 | 95.9               | 93.8 | 93.6  |
| 3                                                                             | 0.000 | 0.001  | -0.038 | 0.001 | 0.160 | 0.182 | 0.189 | 95.4               | 93.6 | 94.0  |
| $I^2$ or ratio of IQR squares (%)                                             |       |        |        |       |       |       |       |                    |      |       |
| 1                                                                             | 20.0  | 3.99   | 4.33   | 5.94  | 15.11 | 15.45 | 16.17 | 98.1               | 97.7 | 97.5  |
| 2                                                                             | 40.0  | -1.84  | -1.96  | 0.15  | 17.69 | 18.22 | 17.86 | 96.9               | 96.6 | 96.2  |
| 3                                                                             | 80.0  | -0.83  | -0.95  | 0.22  | 8.40  | 9.27  | 8.29  | 93.3               | 92.2 | 93.0  |
| Scenario 4-6: Skew-normal distribution with moderate positive skewness (pSN1) |       |        |        |       |       |       |       |                    |      |       |
| Overall mean or overall median effect                                         |       |        |        |       |       |       |       |                    |      |       |
| 4                                                                             | 0.000 | 0.026  | 0.007  | 0.022 | 0.085 | 0.087 | 0.094 | 95.5               | 94.8 | 93.7  |
| 5                                                                             | 0.000 | 0.045  | 0.013  | 0.029 | 0.104 | 0.102 | 0.113 | 93.7               | 93.8 | 92.6  |
| 6                                                                             | 0.000 | 0.109  | 0.010  | 0.027 | 0.193 | 0.167 | 0.181 | 92.9               | 94.8 | 93.9  |
| $I^2$ or ratio of IQR squares (%)                                             |       |        |        |       |       |       |       |                    |      |       |
| 4                                                                             | 20.0  | 3.75   | 4.31   | 5.67  | 15.09 | 15.59 | 16.12 | 97.8               | 97.3 | 97.2  |
| 5                                                                             | 40.0  | -1.80  | -1.30  | -0.04 | 18.02 | 18.42 | 18.07 | 95.9               | 95.9 | 95.9  |
| 6                                                                             | 80.0  | -1.12  | -1.16  | -0.89 | 9.25  | 9.77  | 9.32  | 91.3               | 92.9 | 93.6  |
| Scenario 7-9: Skew-normal distribution with large positive skewness (pSN2)    |       |        |        |       |       |       |       |                    |      |       |
| Overall mean or overall median effect                                         |       |        |        |       |       |       |       |                    |      |       |
| 7                                                                             | 0.000 | 0.030  | 0.011  | 0.026 | 0.085 | 0.086 | 0.094 | 95.4               | 95.0 | 94.0  |
| 8                                                                             | 0.000 | 0.051  | 0.018  | 0.033 | 0.106 | 0.101 | 0.111 | 92.8               | 93.6 | 92.3  |
| 9                                                                             | 0.000 | 0.125  | 0.018  | 0.033 | 0.201 | 0.165 | 0.179 | 91.6               | 94.7 | 93.3  |
| $I^2$ or ratio of IQR squares (%)                                             |       |        |        |       |       |       |       |                    |      |       |
| 7                                                                             | 20.0  | 3.24   | 3.87   | 5.19  | 14.80 | 15.25 | 15.77 | 98.2               | 97.8 | 97.8  |
| 8                                                                             | 40.0  | -3.15  | -2.74  | -1.53 | 18.24 | 18.54 | 18.13 | 96.6               | 96.5 | 96.6  |
| 9                                                                             | 80.0  | -2.05  | -2.40  | -2.23 | 9.97  | 10.58 | 10.31 | 91.6               | 94.1 | 94.5  |

RMSE: root mean square error, prob.: probability

NRE: normal random effects model, BC: proposed model using Box-Cox transformation

BC-SI: proposed model using Box-Cox transformation with the sign inversion for negatively skewed data

Table S3 (cont'd). Bias, root mean square error, coverage probability from the two models for scenario of the number of studies  $k = 20$ .

| Scenario                                                                        | True  | Bias   |        |        | RMSE  |       |       | Coverage prob. (%) |      |       |
|---------------------------------------------------------------------------------|-------|--------|--------|--------|-------|-------|-------|--------------------|------|-------|
|                                                                                 |       | NRE    | BC     | BC-SI  | NRE   | BC    | BC-SI | NRE                | BC   | BC-SI |
| Scenario 10-12: Skew-normal distribution with moderate negative skewness (nSN1) |       |        |        |        |       |       |       |                    |      |       |
| Overall mean or overall median effect                                           |       |        |        |        |       |       |       |                    |      |       |
| 10                                                                              | 0.000 | -0.028 | -0.041 | -0.024 | 0.085 | 0.096 | 0.093 | 95.6               | 93.1 | 93.7  |
| 11                                                                              | 0.000 | -0.046 | -0.054 | -0.031 | 0.103 | 0.115 | 0.111 | 94.1               | 91.8 | 93.0  |
| 12                                                                              | 0.000 | -0.109 | -0.080 | -0.029 | 0.195 | 0.199 | 0.183 | 92.5               | 90.8 | 93.7  |
| $I^2$ or ratio of IQR squares (%)                                               |       |        |        |        |       |       |       |                    |      |       |
| 10                                                                              | 20.0  | 4.03   | 4.09   | 5.93   | 15.22 | 15.46 | 16.25 | 97.8               | 97.4 | 97.1  |
| 11                                                                              | 40.0  | -2.01  | -3.25  | -0.22  | 17.94 | 18.28 | 17.96 | 96.2               | 96.8 | 96.2  |
| 12                                                                              | 80.0  | -1.23  | -4.04  | -0.94  | 9.32  | 11.33 | 9.24  | 91.0               | 92.4 | 93.5  |
| Scenario 13-15: Skew-normal distribution with large negative skewness (nSN2)    |       |        |        |        |       |       |       |                    |      |       |
| Overall mean or overall median effect                                           |       |        |        |        |       |       |       |                    |      |       |
| 13                                                                              | 0.000 | -0.032 | -0.044 | -0.027 | 0.086 | 0.097 | 0.095 | 95.2               | 92.7 | 93.2  |
| 14                                                                              | 0.000 | -0.050 | -0.057 | -0.035 | 0.105 | 0.117 | 0.111 | 93.5               | 90.8 | 92.5  |
| 15                                                                              | 0.000 | -0.127 | -0.089 | -0.036 | 0.202 | 0.199 | 0.179 | 91.5               | 89.8 | 93.3  |
| $I^2$ or ratio of IQR squares (%)                                               |       |        |        |        |       |       |       |                    |      |       |
| 13                                                                              | 20.0  | 3.36   | 3.34   | 5.28   | 14.74 | 14.86 | 15.74 | 98.1               | 98.0 | 97.8  |
| 14                                                                              | 40.0  | -3.31  | -4.77  | -1.65  | 18.12 | 18.55 | 18.03 | 96.7               | 97.2 | 96.8  |
| 15                                                                              | 80.0  | -2.10  | -5.84  | -2.24  | 10.02 | 12.90 | 10.20 | 91.5               | 91.3 | 94.4  |
| Scenario 16-18: Shifted exponential distribution (EXP)                          |       |        |        |        |       |       |       |                    |      |       |
| Overall mean or overall median effect                                           |       |        |        |        |       |       |       |                    |      |       |
| 16                                                                              | 0.000 | 0.059  | 0.032  | 0.045  | 0.103 | 0.094 | 0.103 | 91.9               | 93.3 | 91.5  |
| 17                                                                              | 0.000 | 0.095  | 0.044  | 0.055  | 0.139 | 0.111 | 0.120 | 89.1               | 92.9 | 91.8  |
| 18                                                                              | 0.000 | 0.238  | 0.070  | 0.076  | 0.304 | 0.184 | 0.190 | 85.0               | 94.7 | 94.1  |
| $I^2$ or ratio of IQR squares (%)                                               |       |        |        |        |       |       |       |                    |      |       |
| 16                                                                              | 20.0  | 7.87   | 8.28   | 9.37   | 18.51 | 18.73 | 19.20 | 94.0               | 94.3 | 94.1  |
| 17                                                                              | 40.0  | 5.11   | 4.21   | 4.94   | 20.61 | 20.14 | 19.95 | 86.1               | 89.8 | 89.8  |
| 18                                                                              | 80.0  | 2.31   | -0.66  | -0.60  | 10.99 | 11.39 | 11.24 | 69.4               | 87.8 | 88.1  |
| Scenario 19-21: Shifted log-normal distribution (LN)                            |       |        |        |        |       |       |       |                    |      |       |
| Overall mean or overall median effect                                           |       |        |        |        |       |       |       |                    |      |       |
| 19                                                                              | 0.000 | 0.013  | -0.006 | 0.010  | 0.082 | 0.088 | 0.093 | 96.4               | 94.9 | 94.3  |
| 20                                                                              | 0.000 | 0.034  | 0.001  | 0.018  | 0.101 | 0.102 | 0.110 | 94.4               | 94.3 | 93.6  |
| 21                                                                              | 0.000 | 0.208  | 0.041  | 0.048  | 0.286 | 0.177 | 0.183 | 90.0               | 95.5 | 94.9  |
| $I^2$ or ratio of IQR squares (%)                                               |       |        |        |        |       |       |       |                    |      |       |
| 19                                                                              | 20.0  | 4.19   | 4.69   | 6.13   | 15.36 | 15.77 | 16.44 | 97.9               | 97.6 | 97.4  |
| 20                                                                              | 40.0  | -0.23  | 0.04   | 1.37   | 18.04 | 18.47 | 18.16 | 95.1               | 94.9 | 94.9  |
| 21                                                                              | 80.0  | 3.35   | 1.00   | 1.08   | 10.58 | 10.36 | 10.18 | 66.4               | 85.0 | 85.3  |

RMSE: root mean square error, prob.: probability

NRE: normal random effects model, BC: proposed model using Box-Cox transformation

BC-SI: proposed model using Box-Cox transformation with the sign inversion for negatively skewed data

Table S4. Bias, root mean square error, coverage probability from the two models for scenario of the number of studies  $k = 40$ .

| Scenario                                                                      | True  | Bias  |        |       | RMSE  |       |       | Coverage prob. (%) |      |       |
|-------------------------------------------------------------------------------|-------|-------|--------|-------|-------|-------|-------|--------------------|------|-------|
|                                                                               |       | NRE   | BC     | BC-SI | NRE   | BC    | BC-SI | NRE                | BC   | BC-SI |
| Scenario 1-3: Normal distribution (N)                                         |       |       |        |       |       |       |       |                    |      |       |
| Overall mean or overall median effect                                         |       |       |        |       |       |       |       |                    |      |       |
| 1                                                                             | 0.000 | 0.000 | -0.009 | 0.000 | 0.056 | 0.062 | 0.064 | 95.8               | 94.1 | 93.7  |
| 2                                                                             | 0.000 | 0.000 | -0.010 | 0.000 | 0.066 | 0.073 | 0.075 | 94.8               | 92.8 | 93.1  |
| 3                                                                             | 0.000 | 0.000 | -0.019 | 0.001 | 0.113 | 0.126 | 0.130 | 95.0               | 93.3 | 93.1  |
| $I^2$ or ratio of IQR squares (%)                                             |       |       |        |       |       |       |       |                    |      |       |
| 1                                                                             | 20.0  | 0.11  | 0.41   | 1.92  | 12.51 | 12.82 | 13.27 | 98.0               | 97.7 | 97.1  |
| 2                                                                             | 40.0  | -2.72 | -2.56  | -0.67 | 14.86 | 15.26 | 14.73 | 95.2               | 94.7 | 94.8  |
| 3                                                                             | 80.0  | -0.44 | -0.35  | 0.51  | 5.44  | 5.72  | 5.28  | 93.7               | 92.2 | 92.3  |
| Scenario 4-6: Skew-normal distribution with moderate positive skewness (pSN1) |       |       |        |       |       |       |       |                    |      |       |
| Overall mean or overall median effect                                         |       |       |        |       |       |       |       |                    |      |       |
| 4                                                                             | 0.000 | 0.027 | 0.014  | 0.022 | 0.063 | 0.063 | 0.067 | 93.4               | 93.3 | 92.1  |
| 5                                                                             | 0.000 | 0.044 | 0.021  | 0.029 | 0.080 | 0.074 | 0.080 | 90.7               | 92.1 | 90.8  |
| 6                                                                             | 0.000 | 0.109 | 0.029  | 0.033 | 0.157 | 0.121 | 0.127 | 86.7               | 94.0 | 93.2  |
| $I^2$ or ratio of IQR squares (%)                                             |       |       |        |       |       |       |       |                    |      |       |
| 4                                                                             | 20.0  | 0.34  | 0.89   | 2.07  | 12.76 | 13.18 | 13.49 | 97.6               | 97.2 | 96.7  |
| 5                                                                             | 40.0  | -2.56 | -1.84  | -0.86 | 15.08 | 15.37 | 14.93 | 94.0               | 94.0 | 94.2  |
| 6                                                                             | 80.0  | -0.38 | -0.25  | -0.18 | 5.79  | 5.83  | 5.72  | 91.1               | 92.6 | 92.9  |
| Scenario 7-9: Skew-normal distribution with large positive skewness (pSN2)    |       |       |        |       |       |       |       |                    |      |       |
| Overall mean or overall median effect                                         |       |       |        |       |       |       |       |                    |      |       |
| 7                                                                             | 0.000 | 0.030 | 0.017  | 0.025 | 0.065 | 0.064 | 0.069 | 92.6               | 92.9 | 91.2  |
| 8                                                                             | 0.000 | 0.051 | 0.027  | 0.034 | 0.083 | 0.075 | 0.081 | 88.7               | 91.6 | 90.1  |
| 9                                                                             | 0.000 | 0.126 | 0.038  | 0.041 | 0.169 | 0.120 | 0.124 | 83.1               | 93.4 | 92.8  |
| $I^2$ or ratio of IQR squares (%)                                             |       |       |        |       |       |       |       |                    |      |       |
| 7                                                                             | 20.0  | 0.04  | 0.54   | 1.74  | 12.41 | 12.81 | 13.09 | 98.2               | 97.7 | 97.3  |
| 8                                                                             | 40.0  | -3.71 | -2.97  | -2.09 | 15.38 | 15.56 | 15.20 | 94.1               | 93.8 | 94.4  |
| 9                                                                             | 80.0  | -1.12 | -1.25  | -1.21 | 6.14  | 6.23  | 6.16  | 91.2               | 93.4 | 93.7  |

RMSE: root mean square error, prob.: probability

NRE: normal random effects model, BC: proposed model using Box-Cox transformation

BC-SI: proposed model using Box-Cox transformation with the sign inversion for negatively skewed data

Table S4 (cont'd). Bias, root mean square error, coverage probability from the two models for scenario of the number of studies  $k = 40$ .

| Scenario                                                                        | True  | Bias   |        |        | RMSE  |       |       | Coverage prob. (%) |      |       |
|---------------------------------------------------------------------------------|-------|--------|--------|--------|-------|-------|-------|--------------------|------|-------|
|                                                                                 |       | NRE    | BC     | BC-SI  | NRE   | BC    | BC-SI | NRE                | BC   | BC-SI |
| Scenario 10-12: Skew-normal distribution with moderate negative skewness (nSN1) |       |        |        |        |       |       |       |                    |      |       |
| Overall mean or overall median effect                                           |       |        |        |        |       |       |       |                    |      |       |
| 10                                                                              | 0.000 | -0.027 | -0.032 | -0.022 | 0.062 | 0.069 | 0.066 | 93.6               | 91.2 | 92.2  |
| 11                                                                              | 0.000 | -0.043 | -0.039 | -0.028 | 0.078 | 0.082 | 0.079 | 91.3               | 89.3 | 91.0  |
| 12                                                                              | 0.000 | -0.110 | -0.061 | -0.035 | 0.157 | 0.138 | 0.126 | 86.8               | 89.1 | 93.2  |
| $I^2$ or ratio of IQR squares (%)                                               |       |        |        |        |       |       |       |                    |      |       |
| 10                                                                              | 20.0  | 0.27   | 0.16   | 2.01   | 12.58 | 12.72 | 13.29 | 97.7               | 97.8 | 97.0  |
| 11                                                                              | 40.0  | -2.44  | -4.03  | -0.73  | 15.11 | 15.72 | 15.05 | 94.1               | 94.4 | 94.1  |
| 12                                                                              | 80.0  | -0.41  | -3.30  | -0.20  | 5.81  | 7.38  | 5.74  | 90.8               | 91.1 | 92.8  |
| Scenario 13-15: Skew-normal distribution with large negative skewness (nSN2)    |       |        |        |        |       |       |       |                    |      |       |
| Overall mean or overall median effect                                           |       |        |        |        |       |       |       |                    |      |       |
| 13                                                                              | 0.000 | -0.031 | -0.035 | -0.026 | 0.064 | 0.071 | 0.068 | 92.6               | 90.0 | 91.2  |
| 14                                                                              | 0.000 | -0.051 | -0.046 | -0.034 | 0.083 | 0.086 | 0.082 | 89.0               | 87.5 | 89.8  |
| 15                                                                              | 0.000 | -0.126 | -0.068 | -0.041 | 0.168 | 0.139 | 0.125 | 83.0               | 87.5 | 92.4  |
| $I^2$ or ratio of IQR squares (%)                                               |       |        |        |        |       |       |       |                    |      |       |
| 13                                                                              | 20.0  | -0.24  | -0.38  | 1.46   | 12.37 | 12.53 | 13.02 | 98.2               | 98.0 | 97.5  |
| 14                                                                              | 40.0  | -3.63  | -5.45  | -2.05  | 15.57 | 16.24 | 15.41 | 93.6               | 94.0 | 94.4  |
| 15                                                                              | 80.0  | -1.34  | -5.10  | -1.47  | 6.27  | 8.65  | 6.30  | 90.7               | 88.4 | 93.6  |
| Scenario 16-18: Shifted exponential distribution (EXP)                          |       |        |        |        |       |       |       |                    |      |       |
| Overall mean or overall median effect                                           |       |        |        |        |       |       |       |                    |      |       |
| 16                                                                              | 0.000 | 0.059  | 0.039  | 0.044  | 0.084 | 0.074 | 0.079 | 85.4               | 89.3 | 87.6  |
| 17                                                                              | 0.000 | 0.096  | 0.053  | 0.056  | 0.120 | 0.089 | 0.092 | 76.7               | 88.6 | 87.8  |
| 18                                                                              | 0.000 | 0.238  | 0.082  | 0.083  | 0.273 | 0.145 | 0.146 | 61.9               | 90.4 | 90.4  |
| $I^2$ or ratio of IQR squares (%)                                               |       |        |        |        |       |       |       |                    |      |       |
| 16                                                                              | 20.0  | 5.69   | 5.96   | 6.80   | 15.83 | 15.97 | 16.29 | 91.9               | 92.3 | 91.8  |
| 17                                                                              | 40.0  | 6.47   | 5.30   | 5.66   | 17.55 | 16.95 | 16.85 | 79.9               | 84.6 | 84.7  |
| 18                                                                              | 80.0  | 4.22   | 0.43   | 0.44   | 7.63  | 6.93  | 6.92  | 60.3               | 86.2 | 86.3  |
| Scenario 19-21: Shifted log-normal distribution (LN)                            |       |        |        |        |       |       |       |                    |      |       |
| Overall mean or overall median effect                                           |       |        |        |        |       |       |       |                    |      |       |
| 19                                                                              | 0.000 | 0.012  | 0.001  | 0.009  | 0.058 | 0.062 | 0.065 | 94.8               | 93.7 | 93.2  |
| 20                                                                              | 0.000 | 0.034  | 0.012  | 0.019  | 0.075 | 0.073 | 0.078 | 92.4               | 93.3 | 92.1  |
| 21                                                                              | 0.000 | 0.208  | 0.054  | 0.054  | 0.250 | 0.134 | 0.134 | 74.4               | 94.1 | 93.8  |
| $I^2$ or ratio of IQR squares (%)                                               |       |        |        |        |       |       |       |                    |      |       |
| 19                                                                              | 20.0  | 0.66   | 1.13   | 2.44   | 12.79 | 13.20 | 13.58 | 97.5               | 97.0 | 96.6  |
| 20                                                                              | 40.0  | -0.58  | 0.03   | 1.09   | 14.77 | 15.14 | 14.83 | 93.6               | 93.1 | 93.4  |
| 21                                                                              | 80.0  | 5.03   | 1.86   | 1.87   | 8.12  | 6.47  | 6.46  | 55.4               | 82.8 | 82.9  |

RMSE: root mean square error, prob.: probability

NRE: normal random effects model, BC: proposed model using Box-Cox transformation

BC-SI: proposed model using Box-Cox transformation with the sign inversion for negatively skewed data

### 3 Summary statistics of estimates for the transformation and the shift parameter in the simulation study

Table S5 and Table S6 show summary statistics of estimates for the transformation ( $\lambda$ ) and the shift ( $\alpha$ ) parameter respectively, for each scenario of the number of studies  $k = 40$ .

Table S5. Summary statistics of estimates for the transformation parameter ( $\lambda$ ), for scenario of the number of studies  $k = 40$ .

| Scenario | Random effects |        | Mean  | SD    | Min   | Q1    | Median | Q3   | Max  |
|----------|----------------|--------|-------|-------|-------|-------|--------|------|------|
|          | distribution   | Method |       |       |       |       |        |      |      |
| 1        | N              | BC     | 1.155 | 0.678 | -2.02 | 0.74  | 0.86   | 1.55 | 4.54 |
| 2        | N              | BC     | 1.131 | 0.635 | -1.48 | 0.74  | 0.86   | 1.48 | 4.48 |
| 3        | N              | BC     | 1.064 | 0.483 | -0.94 | 0.76  | 0.86   | 1.38 | 4.00 |
| 4        | pSN1           | BC     | 1.053 | 0.627 | -1.74 | 0.72  | 0.82   | 1.23 | 4.86 |
| 5        | pSN1           | BC     | 0.914 | 0.535 | -1.72 | 0.68  | 0.78   | 0.90 | 4.28 |
| 6        | pSN1           | BC     | 0.627 | 0.327 | -1.54 | 0.56  | 0.66   | 0.74 | 2.70 |
| 7        | pSN2           | BC     | 1.051 | 0.626 | -1.60 | 0.72  | 0.82   | 1.26 | 4.42 |
| 8        | pSN2           | BC     | 0.884 | 0.528 | -1.96 | 0.67  | 0.78   | 0.88 | 4.36 |
| 9        | pSN2           | BC     | 0.577 | 0.332 | -1.67 | 0.53  | 0.62   | 0.71 | 2.92 |
| 10       | nSN1           | BC     | 1.251 | 0.717 | -1.44 | 0.76  | 0.88   | 1.70 | 4.56 |
| 11       | nSN1           | BC     | 1.446 | 0.779 | -1.04 | 0.82  | 1.19   | 1.98 | 5.32 |
| 12       | nSN1           | BC     | 1.863 | 0.716 | 0.36  | 1.38  | 1.88   | 2.36 | 4.82 |
| 13       | nSN2           | BC     | 1.262 | 0.727 | -1.30 | 0.76  | 0.88   | 1.72 | 4.50 |
| 14       | nSN2           | BC     | 1.485 | 0.798 | -1.48 | 0.82  | 1.30   | 2.02 | 5.14 |
| 15       | nSN2           | BC     | 2.029 | 0.731 | 0.58  | 1.58  | 2.04   | 2.52 | 5.00 |
| 16       | EXP            | BC     | 0.878 | 0.603 | -2.72 | 0.66  | 0.78   | 0.90 | 4.24 |
| 17       | EXP            | BC     | 0.586 | 0.621 | -2.57 | 0.56  | 0.68   | 0.80 | 4.34 |
| 18       | EXP            | BC     | 0.166 | 0.608 | -2.00 | -0.24 | 0.44   | 0.56 | 2.45 |
| 19       | LN             | BC     | 1.095 | 0.644 | -2.01 | 0.72  | 0.84   | 1.39 | 4.54 |
| 20       | LN             | BC     | 0.926 | 0.549 | -2.00 | 0.68  | 0.80   | 0.92 | 4.60 |
| 21       | LN             | BC     | 0.186 | 0.620 | -2.08 | -0.24 | 0.47   | 0.58 | 2.09 |

SD: standard deviation, N: normal distribution

pSN1: skew-normal distribution with moderate positive skewness

pSN2: skew-normal distribution with large positive skewness

nSN1: skew-normal distribution with moderate negative skewness

nSN2: skew-normal distribution with large negative skewness

EXP: shifted exponential distribution, LN: shifted log-normal distribution

BC: proposed model using Box-Cox transformation

BC-SI: proposed model using Box-Cox transformation with the sign inversion for negatively skewed data

Table S5 (cont'd). Summary statistics of estimates for the transformation parameter ( $\lambda$ ), for scenario of the number of studies  $k = 40$ .

| Scenario | Random effects |        | Mean  | SD    | Min   | Q1    | Median | Q3   | Max  |
|----------|----------------|--------|-------|-------|-------|-------|--------|------|------|
|          | distribution   | Method |       |       |       |       |        |      |      |
| 1        | N              | BC-SI  | 0.726 | 0.234 | -2.02 | 0.66  | 0.74   | 0.82 | 2.34 |
| 2        | N              | BC-SI  | 0.736 | 0.231 | -1.87 | 0.68  | 0.76   | 0.82 | 2.52 |
| 3        | N              | BC-SI  | 0.753 | 0.158 | -1.28 | 0.68  | 0.76   | 0.82 | 2.16 |
| 4        | pSN1           | BC-SI  | 0.727 | 0.237 | -1.74 | 0.66  | 0.74   | 0.82 | 2.42 |
| 5        | pSN1           | BC-SI  | 0.713 | 0.270 | -1.72 | 0.66  | 0.74   | 0.82 | 2.44 |
| 6        | pSN1           | BC-SI  | 0.607 | 0.291 | -1.54 | 0.56  | 0.65   | 0.74 | 2.20 |
| 7        | pSN2           | BC-SI  | 0.722 | 0.248 | -1.60 | 0.66  | 0.74   | 0.82 | 2.89 |
| 8        | pSN2           | BC-SI  | 0.702 | 0.282 | -1.96 | 0.65  | 0.74   | 0.82 | 2.44 |
| 9        | pSN2           | BC-SI  | 0.566 | 0.311 | -1.67 | 0.52  | 0.62   | 0.70 | 1.94 |
| 10       | nSN1           | BC-SI  | 0.727 | 0.240 | -1.66 | 0.66  | 0.74   | 0.82 | 2.76 |
| 11       | nSN1           | BC-SI  | 0.711 | 0.274 | -2.04 | 0.66  | 0.74   | 0.82 | 2.54 |
| 12       | nSN1           | BC-SI  | 0.610 | 0.286 | -1.68 | 0.56  | 0.65   | 0.74 | 2.04 |
| 13       | nSN2           | BC-SI  | 0.728 | 0.241 | -1.65 | 0.66  | 0.74   | 0.82 | 2.43 |
| 14       | nSN2           | BC-SI  | 0.702 | 0.288 | -2.54 | 0.65  | 0.74   | 0.82 | 2.22 |
| 15       | nSN2           | BC-SI  | 0.562 | 0.325 | -1.88 | 0.53  | 0.62   | 0.70 | 1.86 |
| 16       | EXP            | BC-SI  | 0.673 | 0.356 | -2.72 | 0.64  | 0.74   | 0.82 | 2.32 |
| 17       | EXP            | BC-SI  | 0.517 | 0.532 | -2.57 | 0.55  | 0.68   | 0.78 | 2.40 |
| 18       | EXP            | BC-SI  | 0.165 | 0.606 | -2.00 | -0.24 | 0.44   | 0.56 | 1.56 |
| 19       | LN             | BC-SI  | 0.729 | 0.237 | -2.01 | 0.67  | 0.75   | 0.82 | 2.34 |
| 20       | LN             | BC-SI  | 0.711 | 0.283 | -2.24 | 0.66  | 0.74   | 0.82 | 2.60 |
| 21       | LN             | BC-SI  | 0.185 | 0.618 | -2.08 | -0.24 | 0.47   | 0.58 | 2.30 |

SD: standard deviation, N: normal distribution

pSN1: skew-normal distribution with moderate positive skewness

pSN2: skew-normal distribution with large positive skewness

nSN1: skew-normal distribution with moderate negative skewness

nSN2: skew-normal distribution with large negative skewness

EXP: shifted exponential distribution, LN: shifted log-normal distribution

BC: proposed model using Box-Cox transformation

BC-SI: proposed model using Box-Cox transformation with the sign inversion for negatively skewed data

Table S6. Summary statistics of estimates for the shift parameter ( $\alpha$ ), for scenario of the number of studies  $k = 40$ .

| Scenario | Random effects |        | Mean  | SD    | Min  | Q1   | Median | Q3   | Max  |
|----------|----------------|--------|-------|-------|------|------|--------|------|------|
|          | distribution   | Method |       |       |      |      |        |      |      |
| 1        | N              | BC     | 1.468 | 1.011 | 0.31 | 0.71 | 0.87   | 2.77 | 3.97 |
| 2        | N              | BC     | 1.564 | 1.015 | 0.36 | 0.80 | 0.98   | 2.87 | 4.11 |
| 3        | N              | BC     | 2.175 | 1.099 | 0.57 | 1.34 | 1.61   | 3.44 | 5.41 |
| 4        | pSN1           | BC     | 1.316 | 0.956 | 0.23 | 0.66 | 0.81   | 2.30 | 3.73 |
| 5        | pSN1           | BC     | 1.256 | 0.876 | 0.31 | 0.72 | 0.86   | 1.16 | 3.82 |
| 6        | pSN1           | BC     | 1.350 | 0.612 | 0.50 | 1.04 | 1.19   | 1.38 | 4.23 |
| 7        | pSN2           | BC     | 1.315 | 0.956 | 0.28 | 0.66 | 0.81   | 2.32 | 3.84 |
| 8        | pSN2           | BC     | 1.211 | 0.857 | 0.24 | 0.70 | 0.83   | 1.09 | 3.82 |
| 9        | pSN2           | BC     | 1.261 | 0.599 | 0.52 | 0.97 | 1.11   | 1.28 | 4.03 |
| 10       | nSN1           | BC     | 1.605 | 1.043 | 0.32 | 0.75 | 0.94   | 2.87 | 4.04 |
| 11       | nSN1           | BC     | 1.996 | 1.100 | 0.40 | 0.91 | 1.80   | 3.09 | 4.30 |
| 12       | nSN1           | BC     | 3.506 | 1.096 | 0.80 | 3.37 | 3.84   | 4.20 | 6.34 |
| 13       | nSN2           | BC     | 1.621 | 1.048 | 0.35 | 0.75 | 0.94   | 2.88 | 4.06 |
| 14       | nSN2           | BC     | 2.033 | 1.098 | 0.46 | 0.92 | 2.05   | 3.10 | 4.71 |
| 15       | nSN2           | BC     | 3.629 | 1.011 | 0.66 | 3.49 | 3.86   | 4.22 | 7.24 |
| 16       | EXP            | BC     | 1.205 | 0.891 | 0.24 | 0.65 | 0.78   | 1.16 | 3.71 |
| 17       | EXP            | BC     | 1.188 | 0.846 | 0.29 | 0.68 | 0.82   | 1.08 | 3.79 |
| 18       | EXP            | BC     | 1.479 | 0.893 | 0.39 | 0.89 | 1.06   | 1.68 | 4.26 |
| 19       | LN             | BC     | 1.374 | 0.975 | 0.30 | 0.69 | 0.83   | 2.67 | 3.87 |
| 20       | LN             | BC     | 1.295 | 0.885 | 0.33 | 0.74 | 0.89   | 1.23 | 4.19 |
| 21       | LN             | BC     | 1.609 | 0.921 | 0.45 | 0.98 | 1.17   | 2.07 | 4.05 |

SD: standard deviation, N: normal distribution

pSN1: skew-normal distribution with moderate positive skewness

pSN2: skew-normal distribution with large positive skewness

nSN1: skew-normal distribution with moderate negative skewness

nSN2: skew-normal distribution with large negative skewness

EXP: shifted exponential distribution, LN: shifted log-normal distribution

BC: proposed model using Box-Cox transformation

BC-SI: proposed model using Box-Cox transformation with the sign inversion for negatively skewed data

Table S6 (cont'd). Summary statistics of estimates for the shift parameter ( $\alpha$ ), for scenario of the number of studies  $k = 40$ .

| Scenario | Random effects |        | Mean  | SD    | Min  | Q1   | Median | Q3   | Max  |
|----------|----------------|--------|-------|-------|------|------|--------|------|------|
|          | distribution   | Method |       |       |      |      |        |      |      |
| 1        | N              | BC-SI  | 0.836 | 0.450 | 0.34 | 0.64 | 0.74   | 0.86 | 3.32 |
| 2        | N              | BC-SI  | 0.932 | 0.449 | 0.36 | 0.73 | 0.84   | 0.97 | 3.60 |
| 3        | N              | BC-SI  | 1.479 | 0.450 | 0.57 | 1.23 | 1.41   | 1.61 | 4.70 |
| 4        | pSN1           | BC-SI  | 0.837 | 0.459 | 0.23 | 0.64 | 0.74   | 0.86 | 3.32 |
| 5        | pSN1           | BC-SI  | 0.938 | 0.498 | 0.31 | 0.71 | 0.83   | 0.97 | 3.40 |
| 6        | pSN1           | BC-SI  | 1.322 | 0.549 | 0.50 | 1.04 | 1.20   | 1.39 | 4.69 |
| 7        | pSN2           | BC-SI  | 0.840 | 0.467 | 0.28 | 0.63 | 0.74   | 0.86 | 3.36 |
| 8        | pSN2           | BC-SI  | 0.927 | 0.510 | 0.24 | 0.69 | 0.81   | 0.95 | 3.42 |
| 9        | pSN2           | BC-SI  | 1.246 | 0.557 | 0.52 | 0.97 | 1.11   | 1.29 | 4.02 |
| 10       | nSN1           | BC-SI  | 0.835 | 0.454 | 0.28 | 0.64 | 0.74   | 0.86 | 3.45 |
| 11       | nSN1           | BC-SI  | 0.936 | 0.493 | 0.29 | 0.71 | 0.83   | 0.96 | 3.43 |
| 12       | nSN1           | BC-SI  | 1.314 | 0.538 | 0.48 | 1.03 | 1.19   | 1.39 | 4.67 |
| 13       | nSN2           | BC-SI  | 0.833 | 0.456 | 0.23 | 0.64 | 0.74   | 0.86 | 3.41 |
| 14       | nSN2           | BC-SI  | 0.927 | 0.500 | 0.28 | 0.70 | 0.81   | 0.95 | 3.49 |
| 15       | nSN2           | BC-SI  | 1.250 | 0.572 | 0.43 | 0.96 | 1.11   | 1.28 | 4.26 |
| 16       | EXP            | BC-SI  | 0.907 | 0.570 | 0.24 | 0.64 | 0.76   | 0.90 | 3.47 |
| 17       | EXP            | BC-SI  | 1.080 | 0.734 | 0.29 | 0.68 | 0.82   | 1.02 | 3.63 |
| 18       | EXP            | BC-SI  | 1.478 | 0.891 | 0.39 | 0.89 | 1.06   | 1.67 | 4.53 |
| 19       | LN             | BC-SI  | 0.837 | 0.446 | 0.30 | 0.65 | 0.75   | 0.86 | 3.53 |
| 20       | LN             | BC-SI  | 0.955 | 0.498 | 0.33 | 0.72 | 0.84   | 0.99 | 3.56 |
| 21       | LN             | BC-SI  | 1.609 | 0.920 | 0.45 | 0.98 | 1.17   | 2.05 | 4.13 |

SD: standard deviation, N: normal distribution

pSN1: skew-normal distribution with moderate positive skewness

pSN2: skew-normal distribution with large positive skewness

nSN1: skew-normal distribution with moderate negative skewness

nSN2: skew-normal distribution with large negative skewness

EXP: shifted exponential distribution, LN: shifted log-normal distribution

BC: proposed model using Box-Cox transformation

BC-SI: proposed model using Box-Cox transformation with the sign inversion for negatively skewed data
